# Supplementary material for: Voltammetric Detection of Glucose—The Electrochemical Behavior of the Copper Oxide Materials with Well-Defined Facets
Source: MDPI journal article supplement (doi:10.3390/s22134783), 2022-06-24
Supplement: s1 [file s1]

# Supplementary Materials

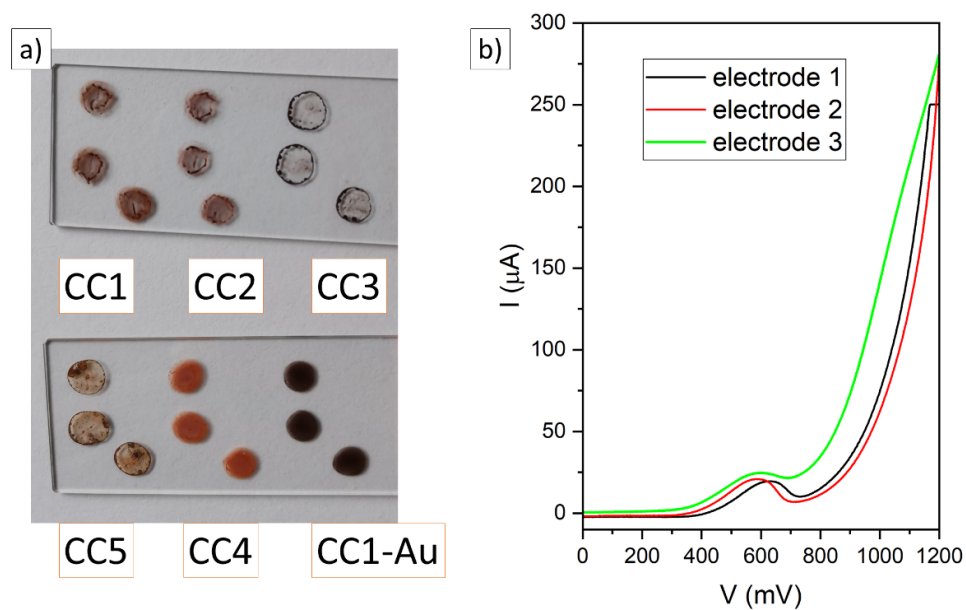

**Figure S1.** (a) Photographs of prepared paste drops displaying powder dispersion in the detection layer, (b) cyclic voltammetry tests proving the reproducibility of the electrodes (paste based on the CC1).

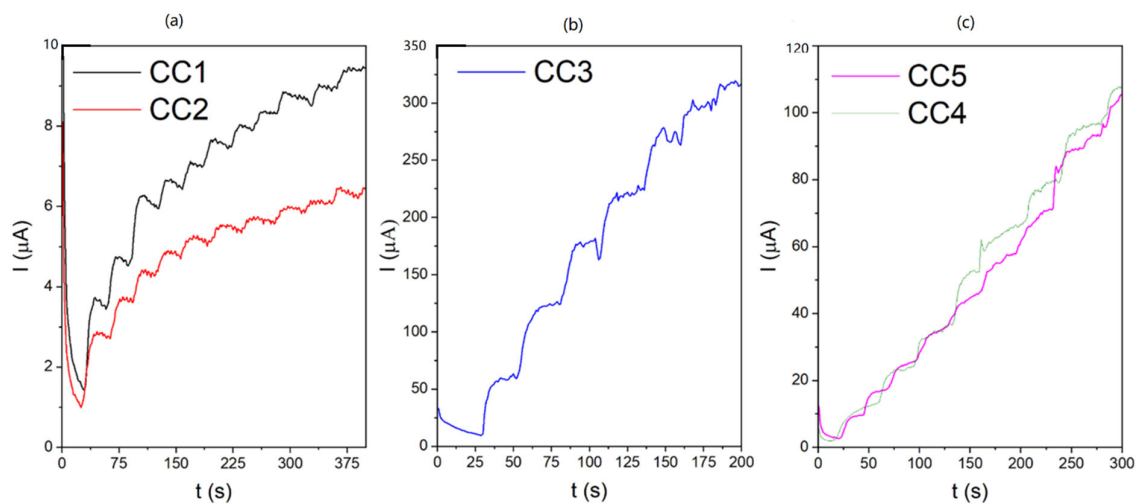

**Figure S2.** Amperometric response of the copper oxide modified GCE electrodes recorded at the applied potential of the (a) 660 mV, (b) 650 mV, and (c) 640 mV.
